# Supplementary material
Source: Springer Nature journal article supplement (https://www.springermedizin.de/resource/supplementary/40478_2014_108_MOESM6_ESM.pdf/25658178)

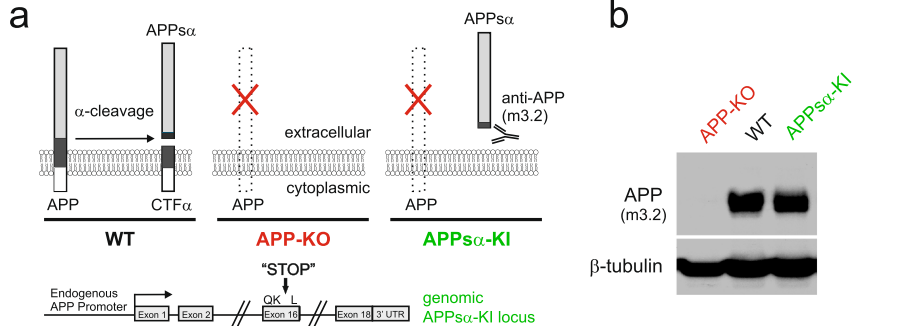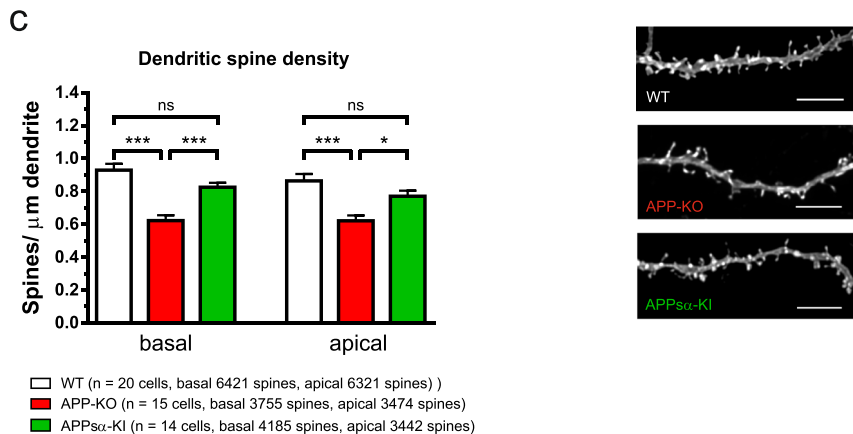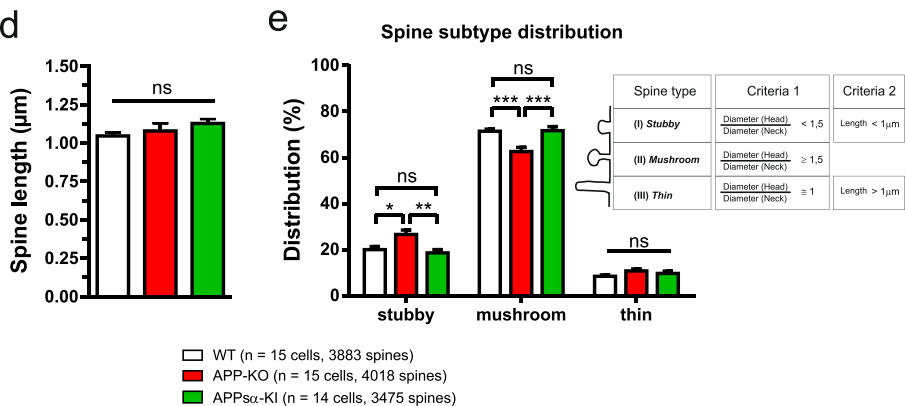

Supplement: MOESM6 [file 25658178]
